# Supplementary material for: Prophylactic Active Tau Immunization Leads to Sustained Reduction in Both Tau and Amyloid-β Pathologies in 3xTg Mice
Source: PubMed Central journal article supplement (PMC5719023; doi:10.1038/s41598-017-17313-1), 2017-12-06

**SREP-17-32224A**

**Prophylactic Active Tau Immunization Leads to Sustained Reduction  
in Both Tau and Amyloid- $\beta$  Pathologies in 3xTg Mice**

Hameetha Rajamohamedsait<sup>1</sup>, Suhail Rasool<sup>1</sup>, Wajitha Rajamohamedsait<sup>1</sup>, Yan Lin<sup>1</sup>, Einar M. Sigurdsson<sup>1, 2\*</sup>

Departments of <sup>1</sup>Neuroscience and Physiology, and <sup>2</sup>Psychiatry, New York University School of Medicine, 550 First Avenue, New York, NY 10016

**\*Correspondence:**

Einar M. Sigurdsson, Ph.D.

Department of Neuroscience and Physiology

Medical Science Building, MSB459

New York University School of Medicine, 550 First Avenue, New York, NY 10016

E-mail: [einar.sigurdsson@nyumc.org](mailto:einar.sigurdsson@nyumc.org)

# Supplementary Information

## Figure 4 A-1

### CP27 Soluble Tau

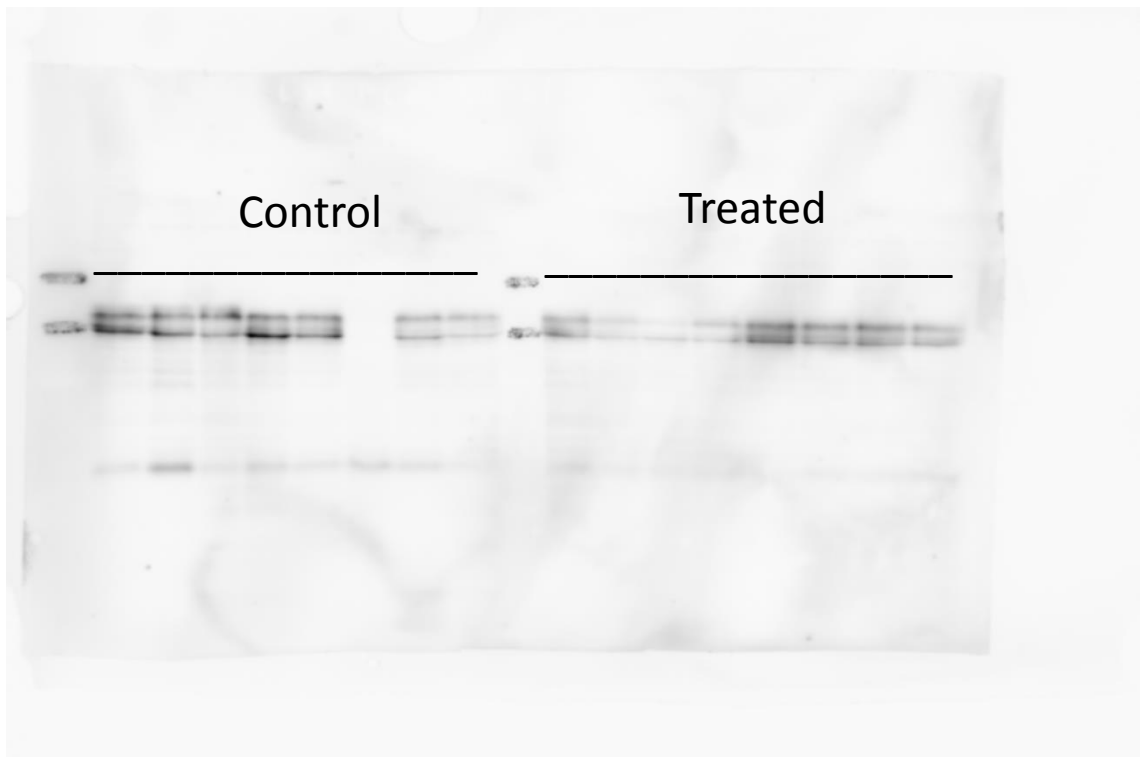

Supplementary Information

Figure 4 A-2

CP27 Insoluble Tau

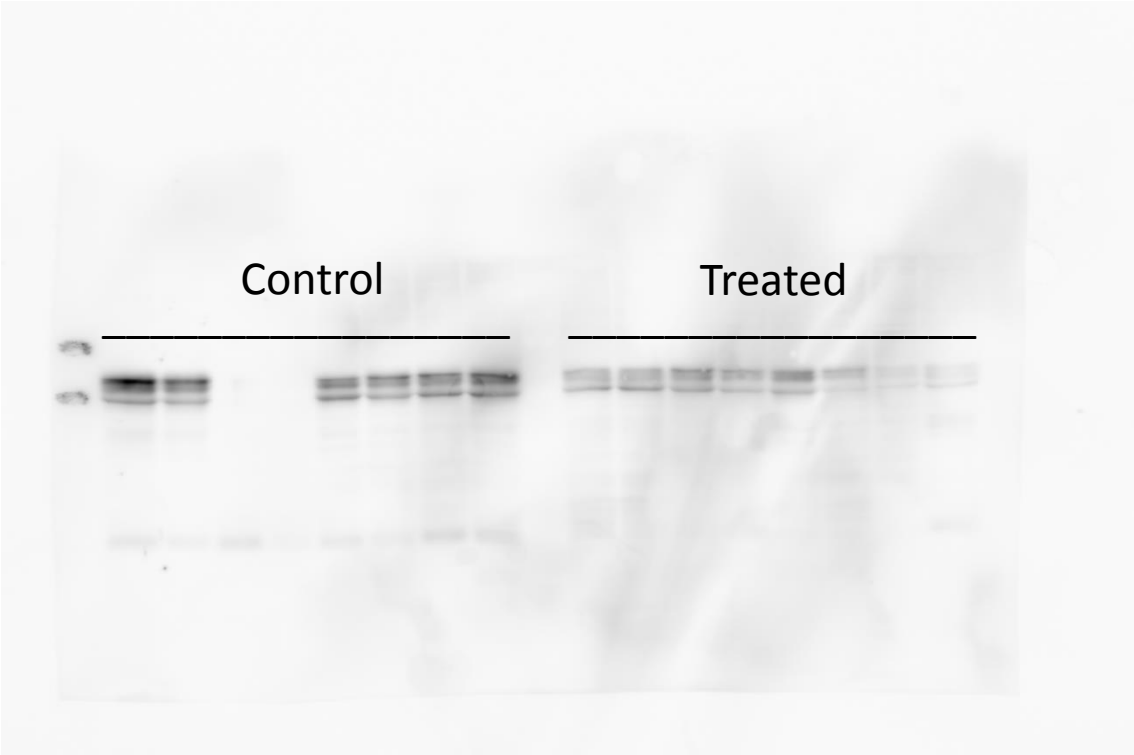

Supplementary Information

Figure 5 A-1

PHF1 Soluble Tau

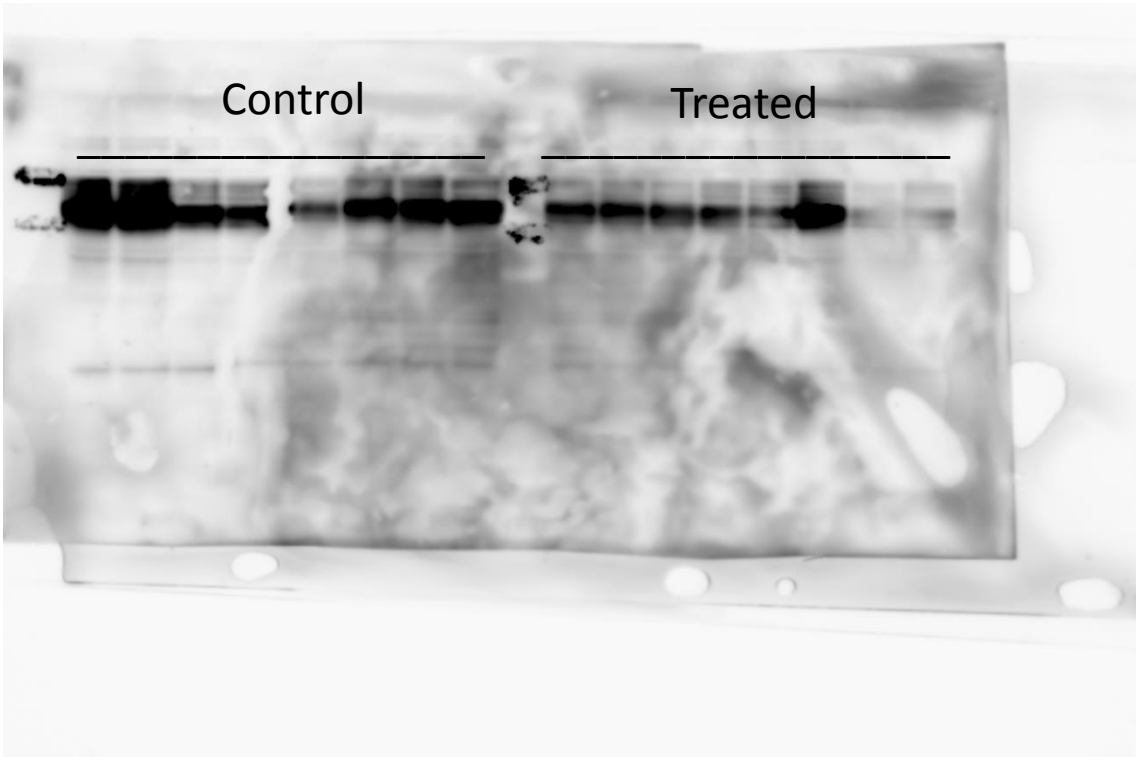

# Supplementary Information

## Figure 5 A-2

### PHF1 Insoluble Tau

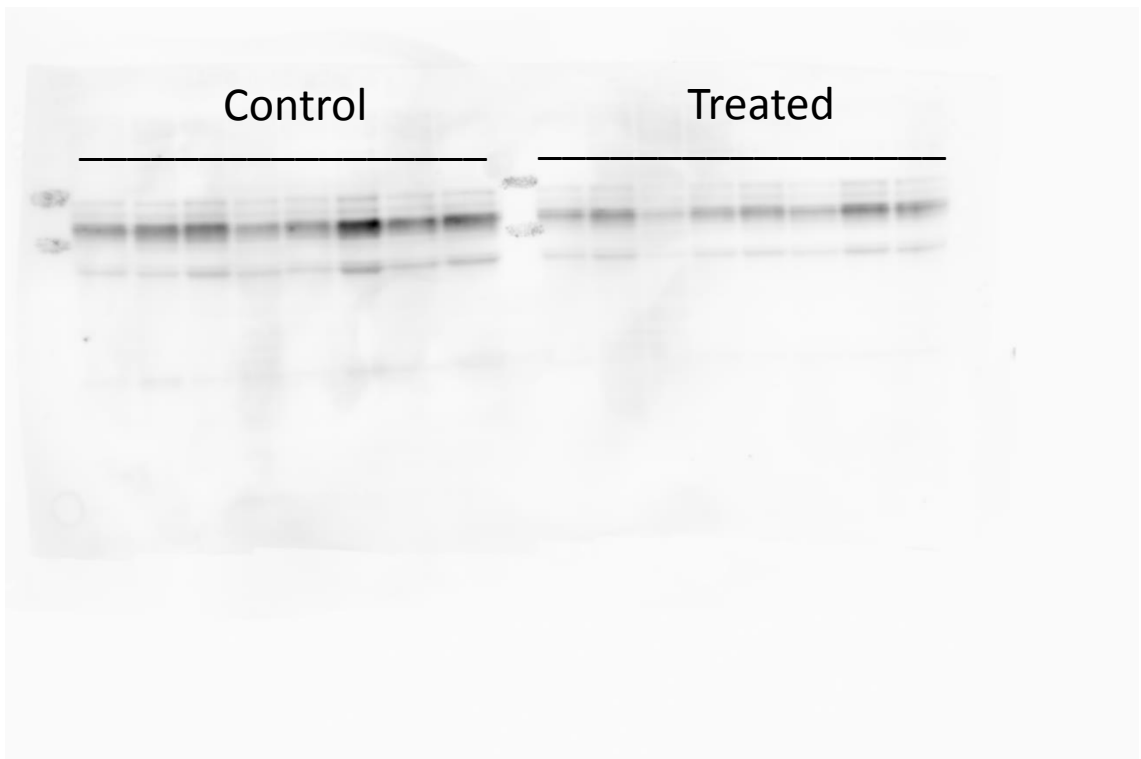

Supplement: 41598_2017_17313_MOESM1_ESM.pdf [file 41598_2017_17313_MOESM1_ESM.pdf]
